# Supplementary material for: Evaluation of the Antiproliferative Activity of the Leaves from Arctium lappa by a Bioassay-Guided Fractionation
Source: Molecules. 2012 Feb 14;17(2):1852–9. doi: 10.3390/molecules17021852 (PMC6268082; doi:10.3390/molecules17021852)
Supplement: Supplementary file 1 [file molecules-17-01852-s001.doc]

**Supplementary Information**

**Evaluation of the Antiproliferative Activity of the Leaves from *Arctium* *lappa* by a Bioassay-Guided Fractionation**

Fábio Bahls Machado 1, Rafael Eidi Yamamoto 2, Karine Zanoli 1, Samara Requena Nocchi 1, Cláudio Roberto Novello 3, Ivânia Teresinha Albrecht Schuquel 4, Cássia Mônica Sakuragui 5, Heinrich Luftmann 6, Tânia Ueda-Nakamura 1, Celso Vataru Nakamura 1 and
João Carlos Palazzo de Mello 1,*

1 Programa de Pós-Graduação em Ciências Farmacêuticas, Universidade Estadual de Maringá,
Av. Colombo, 5790, BR-87020-900, Maringá, PR, Brazil; E-Mails: famafarm@yahoo.com.br (F.B.M.); kazanoli@hotmail.com (K.Z.); samaranocchi@hotmail.com (S.R.N.);
tunakamura@uem.br (T.U.-N.); cvnakamura@uem.br (C.V.N.)

2 Departamento de Ciências Básicas da Saúde, Universidade Estadual de Maringá, Av. Colombo, 5790, BR-87020-900, Maringá, PR, Brazil; E-Mail: thexuxs@gmail.com

3 Departamento de Farmácia, Universidade Estadual de Maringá, Av. Colombo, 5790,
BR-87020-900, Maringá, PR, Brazil; E-Mail: crnovello@uem.br

4 Departamento de Química, Universidade Estadual de Maringá, Av. Colombo, 5790, BR-87020-900, Maringá, PR, Brazil; E-mail: itaschuquel@uem.br

5 Universidade Federal do Rio de Janeiro, Av. Pedro Calmon, 550, BR-21941-901, Rio de Janeiro, RJ, Brazil; E-Mail: cmsakura12@gmail.com

6 Organisch-Chemisches Institut, Universität Münster, D-48149, Münster, Germany;

E-Mail: luftman@uni-muenster.de

***** Author to whom correspondence should be addressed; E-Mail: mello@uem.br;
Tel.: +55-44-3011-4816; Fax: +55-44-3011-5050.

**Figure 1S.** 1H-NMR spectrum of compound **1** (CDCl3/CD3OD, 300 MHz).


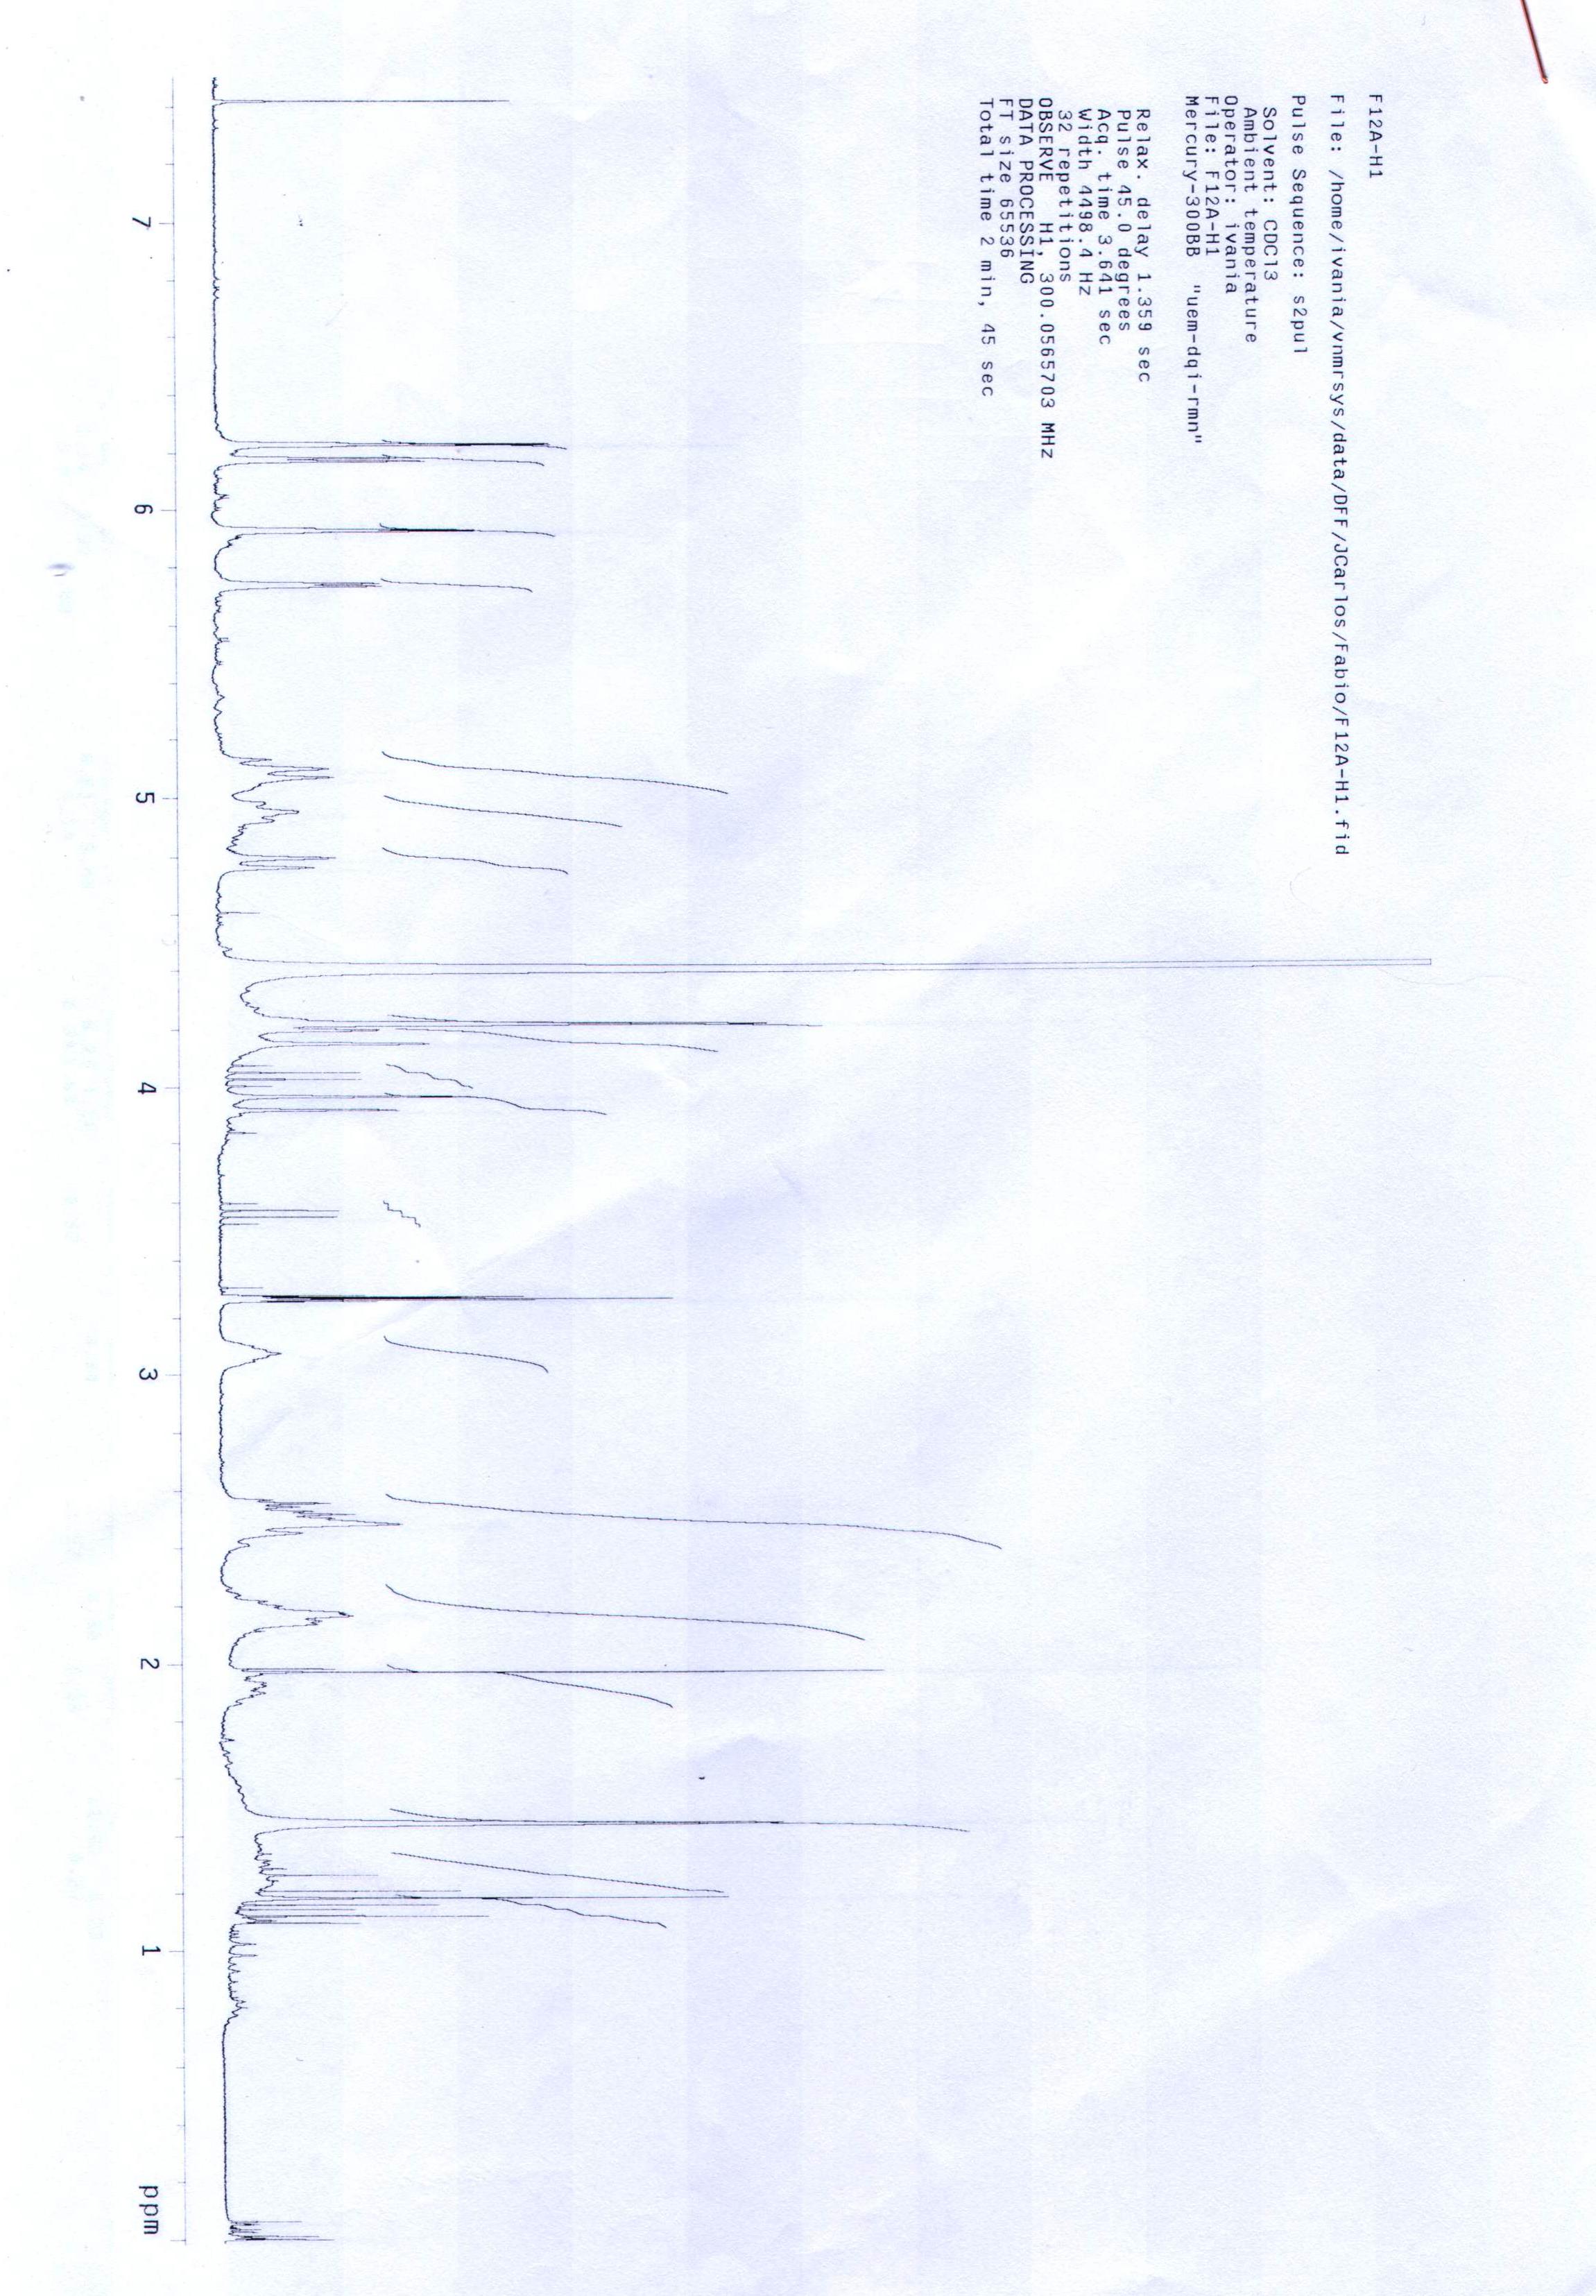


**Onopordopicrin (1)**

**Table 1S.** Data of NMR (CDCl3/CD3OD, 300 MHz for 1H and 75 MHz for 13C) of onopordopicrin (**1**) [17].

| **C** | **13C/DEPT** | **gHSQC**  **1H (nH; m, *J* = Hz)** | **gCOSY**  **1H×1H** | **gHMBC**  **1H13C** |
| --- | --- | --- | --- | --- |
| 1 | 129.6/CH | 4.96 (1H; t; 9.0) | H14; H2 | C3; C9; C14 |
| 2 | 25.8/CH2 | 2.24-2.10 (2H; m) | H3a,b; H1 | C3; C4; C10 |
| 3 | 34.1/CH2 | 2.54 (1H; dt; 11.7; 3.6)  1.91 (1H; m) | H3b; H2ab  H3a; H2a,b | C2; C4  C2; C4 |
| 4 | 144.4/C | - | - | - |
| 5 | 127.9/CH | 4.78 (1H; d; 9.6) | H6 | C7; C15 |
| 6 | 77.1/CH | 5.11 (1H; d;, 9.6) | H5 |  |
| 7 | 52.8/CH | 3.07 (1H; m) | H8; H13a,b |  |
| 8 | 72.8/CH | 5.08 (1H; m) | H7; H8a,b |  |
| 9 | 48.7/CH2 | 2.48-2.41 (2H; m) | H8 | C1; C7; C8; C10; C14 |
| 10 | 131.8/C | - | - | - |
| 11 | 135.3/C | - | - | - |
| 12 | 170.6/C | - | - | - |
| 13 | 125.2/CH2 | 5.74 (1H; d; 2.7)  6.18 (1H; d; 3.3) | H7  H7 | C7; C12  C7; C11; C12 |
| 14 | 16.3/CH3 | 1.44 (3H; s) | - | C1; C9; C10 |
| 15 | 60.0/CH2 | 3.95 (1H; dd; 14.1; 0.7)  4.18 (1H; dd; 14.1; 1.0) | H15b  H15a | C3; C4; C5  C3; C4; C5 |
| 1' | 165.0/C | - | - | - |
| 2' | 139.8/C | - | - | - |
| 3' | 60.4/CH2 | 4.22 (2H; q; 1.5) | H4’a,b | C1’; C4’ |
| 4' | 125.2/CH2 | 5.93 (1H; q; 1.5)  6.23 (1H; q; 1.5) | H3’; H4’b  H3’; H4’a | C1’; C2’; C3’  C1’; C2’; C3’ |

**Figure 2S.** 1H-NMR spectrum of compound **2** (CDCl3/CD3OD, 300 MHz).

**
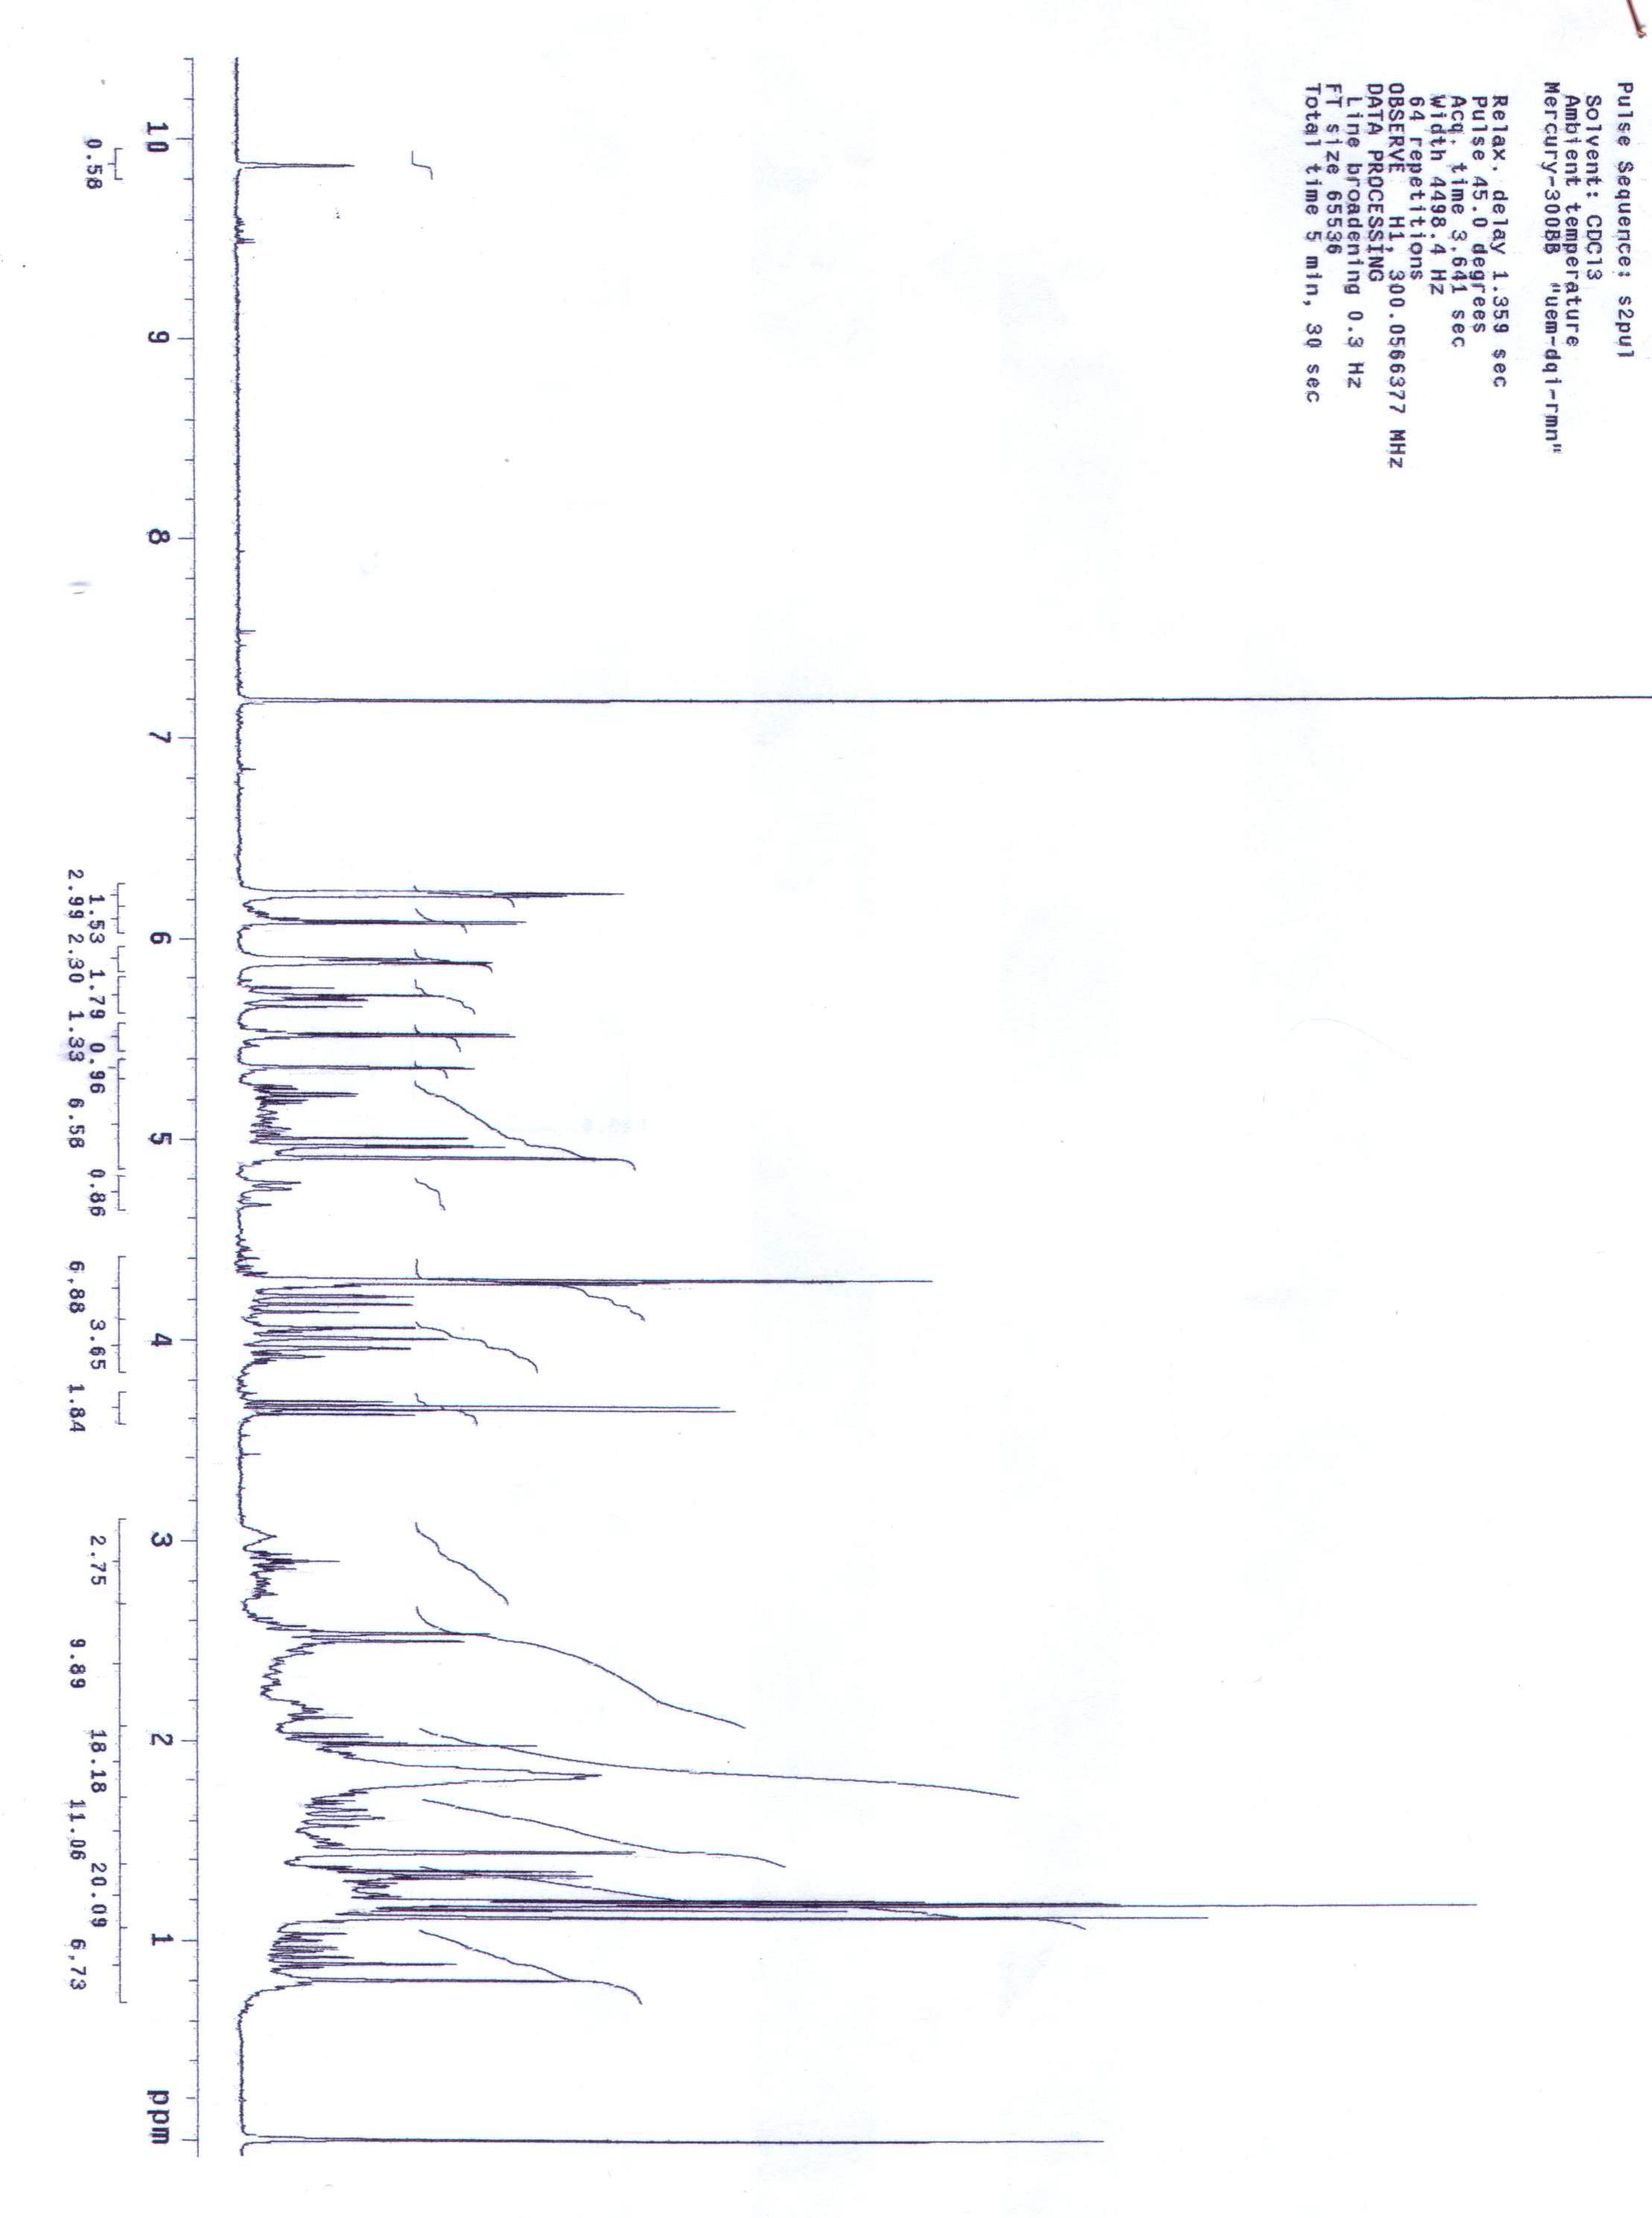
**

**Dehydromelitensin-8-(4'-hydroxy-methacrylate) (2)**

**Table 2S.** Data of NMR (CDCl3/CD3OD, 300 MHz for 1H and 75 MHz for 13C) of dehydromelitensin-8-(4'-hydroxy-methacrylate) (**2**) [18].

| **C** | **13C/DEPT** | **gHSQC**  **1H (nH; m, *J* = Hz)** | **gCOSY**  **1H×1H** | **gHMBC**  **1H13C** |
| --- | --- | --- | --- | --- |
| 1 | 145.8/CH | 5.70 (1H; dd; 17.4; 10.8) | H2a,b | C4 |
| 2 | 113.4/CH2 | a 4.99 (1H; d; 10.8)  b 4.94 (1H; d; 17.4) | H1  H1 | C1; C9  C1; C9 |
| 3 | 115.4/CH2 | a 5.36 (1H; t; 1.5)  b 4.91 (1H; sl) |  | C5  C5 |
| 4 | 143.9/C | - | - |  |
| 5 | 50.8/CH | 2.51 (1H; d; 11.7) | H6 | C3; C4; C6; C7; C10; C14 |
| 6 | 78.9/CH | 4.18 (1H; t; 11.7) | H5; H7 |  |
| 7 | 52.6/CH | 2.90 (1H; tt; 10.8; 3.0) | H13a.b; H6; H8 |  |
| 8 | 69.9/CH | 5.23 (1H; td; 10.8; 4.2) | H9b; H7 |  |
| 9 | 45.3/CH2 | a 1.61 (1H; dd; 12.7; 10.8)  b 2.00 (1H; dd; 12.7; 4.2) | H9b; H8  H9a; H8 | C1; C8  C5; C8 |
| 10 | 41.9/C | - | - | - |
| 11 | 136.8/C | - | - | - |
| 12 | 169.4/C | - | - | - |
| 13 | 120.4/CH2 | 6.09 (1H; d; 3.0)  5.52 (1H; d; 2.7) | H13b; H7  H13a; H7 | C7; C12 |
| 14 | 18.9/CH3 | 1.12 (3H; s) | - | C1; C5; C9; C10 |
| 15 | 67.6/CH2 | 4.04 (1H; d; 14.4)  3.99 (1H; d; 14.4) | H15b; H3a  H15a | C3; C4  C3; C4; C5 |
| 1' | 165.5/C | - | - | - |
| 2' | 139.4/C | - | - | - |
| 3' | 62.5/CH2 | 4.30 (2H; t; 1.2) | H4’a,b | C1’; C2’; C4’ |
| 4' | 126.9/CH2 | 6.23 (1H; m)  5.88 (1H; m) | H3’; H4’b  H3’; H4’a | C1’; C2’; C4’  C1’; C2’; C4’ |

**Figure 3S.** 1H-NMR spectrum of compound **3** (CDCl3/CD3OD, 300 MHz).

**
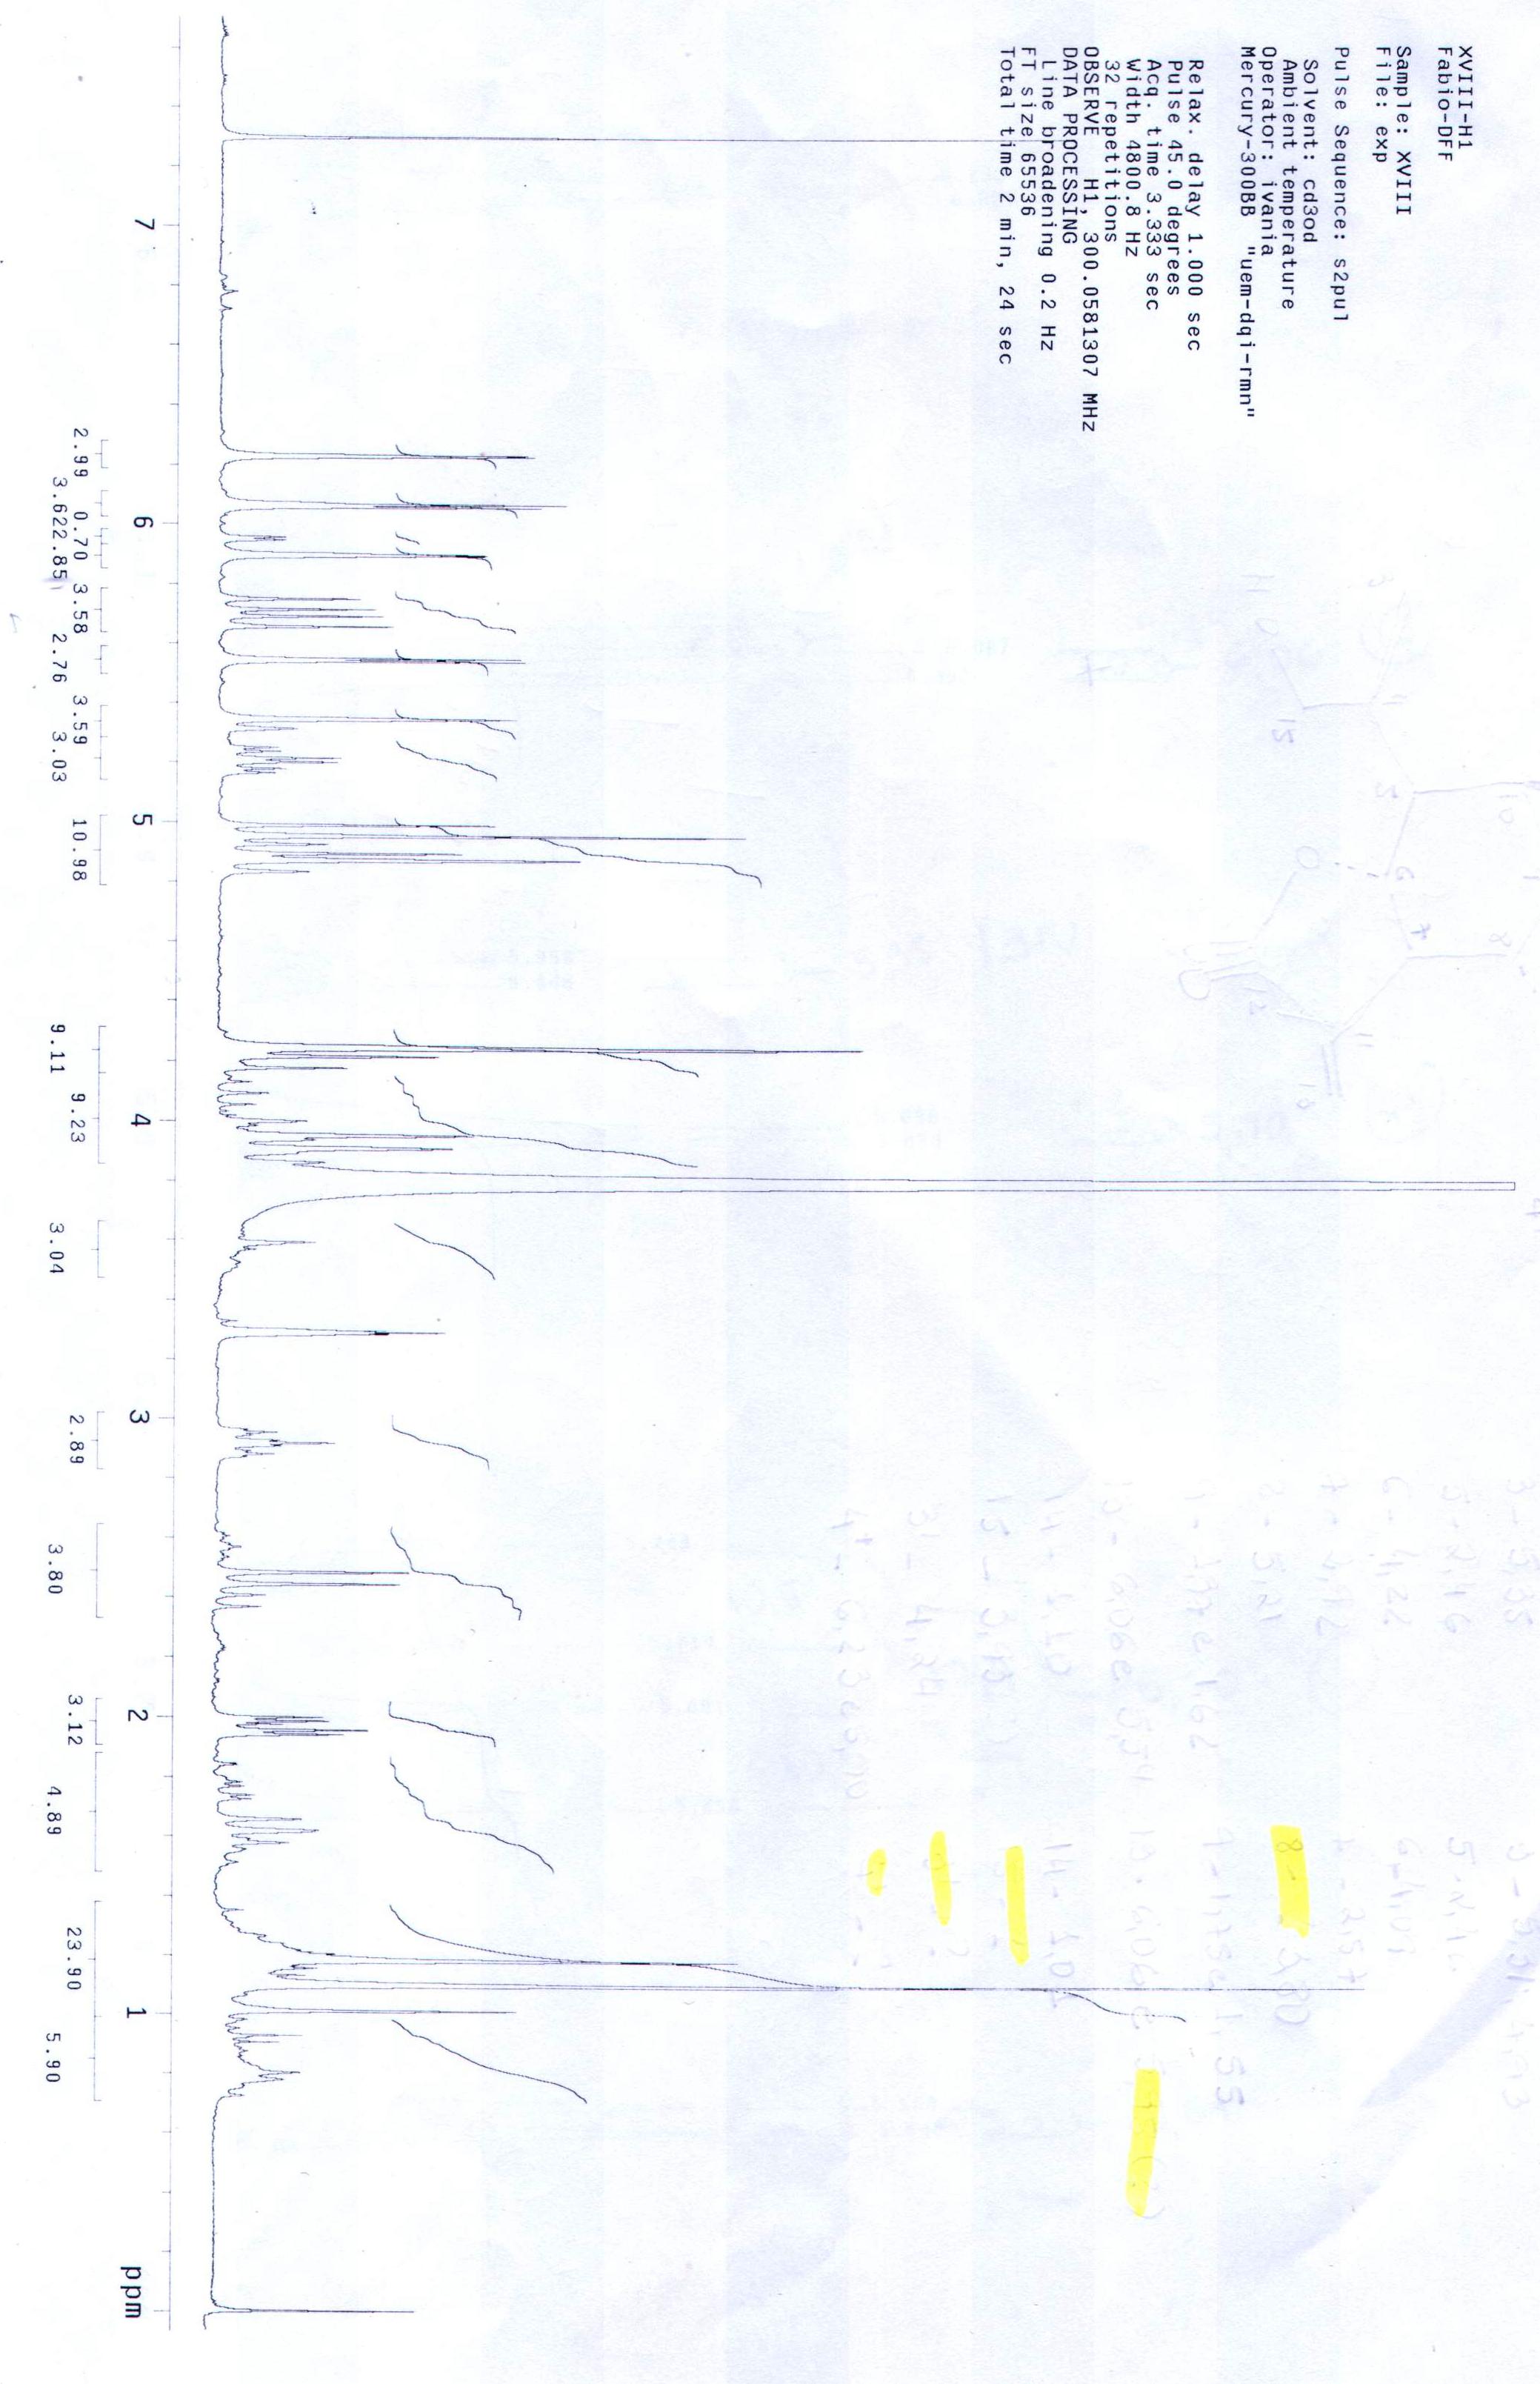
**

**Dehydromelitensin (3)**

**Table 3S.** Data of NMR (CDCl3/CD3OD, 300 MHz for 1H and 75 MHz for 13C) of dehydromelitensin (**3**) [12].

| **C** | **13C/DEPT** | **gHSQC**  **1H (nH; m, *J* = Hz)** | **gCOSY**  **1H×1H** | **gHMBC**  **1H13C** |
| --- | --- | --- | --- | --- |
| 1 | 146.6/CH | 5.70 (1H; dd; 17.4; 10.5) |  | C10 |
| 2 | 111.8/CH2 | a 4.97 (1H; m)  b 4.83 (1H; m) |  | C1 |
| 3 | 114.4/CH2 | a 5.31 (1H; sl)  b 4.93 (1H; sl) | H3b  H3a | C15  C15 |
| 4 | 144.2/C | - | - |  |
| 5 | 50.5/CH | 2.39 (1H; d; 11.7) | H6 | C1; C4; C6; C15 |
| 6 | 79.6 /CH | 4.09 (1H; t; 11.7) | H5; H7 | C10; C11 |
| 7 | 55.1/CH | 2.75 (1H; tt; 10.8; 3.0) | H13a.b; H6; H8 |  |
| 8 | 66.7/CH | 3.80 (1H; m) | H9b; H7; H9a |  |
| 9 | 49.3/CH2 | a 1.55 (1H; dd; 13.5; 10.5)  b 1.75 (1H; dd; 13.5; 4.2) | H9b; H8  H9a; H8 |  |
| 10 | 41.8/C | - | - | - |
| 11 | 137.9/C | - | - | - |
| 12 | 170.1/C | - | - | - |
| 13 | 120.5/CH2 | 5.95 (1H; d; 2.4  6.07 (1H; d; 3.0) | H13b; H7  H13a; H7 |  |
| 14 | 18.7/CH3 | 1.01 (3H; s) | - | C1; C9; C10 |
| 15 | 66.5/CH2 | 3.93 (2H, m) |  |  |

**Figure 4S.** 1H-NMR spectrum of compound **4** (CDCl3/CD3OD, 300 MHz).

**
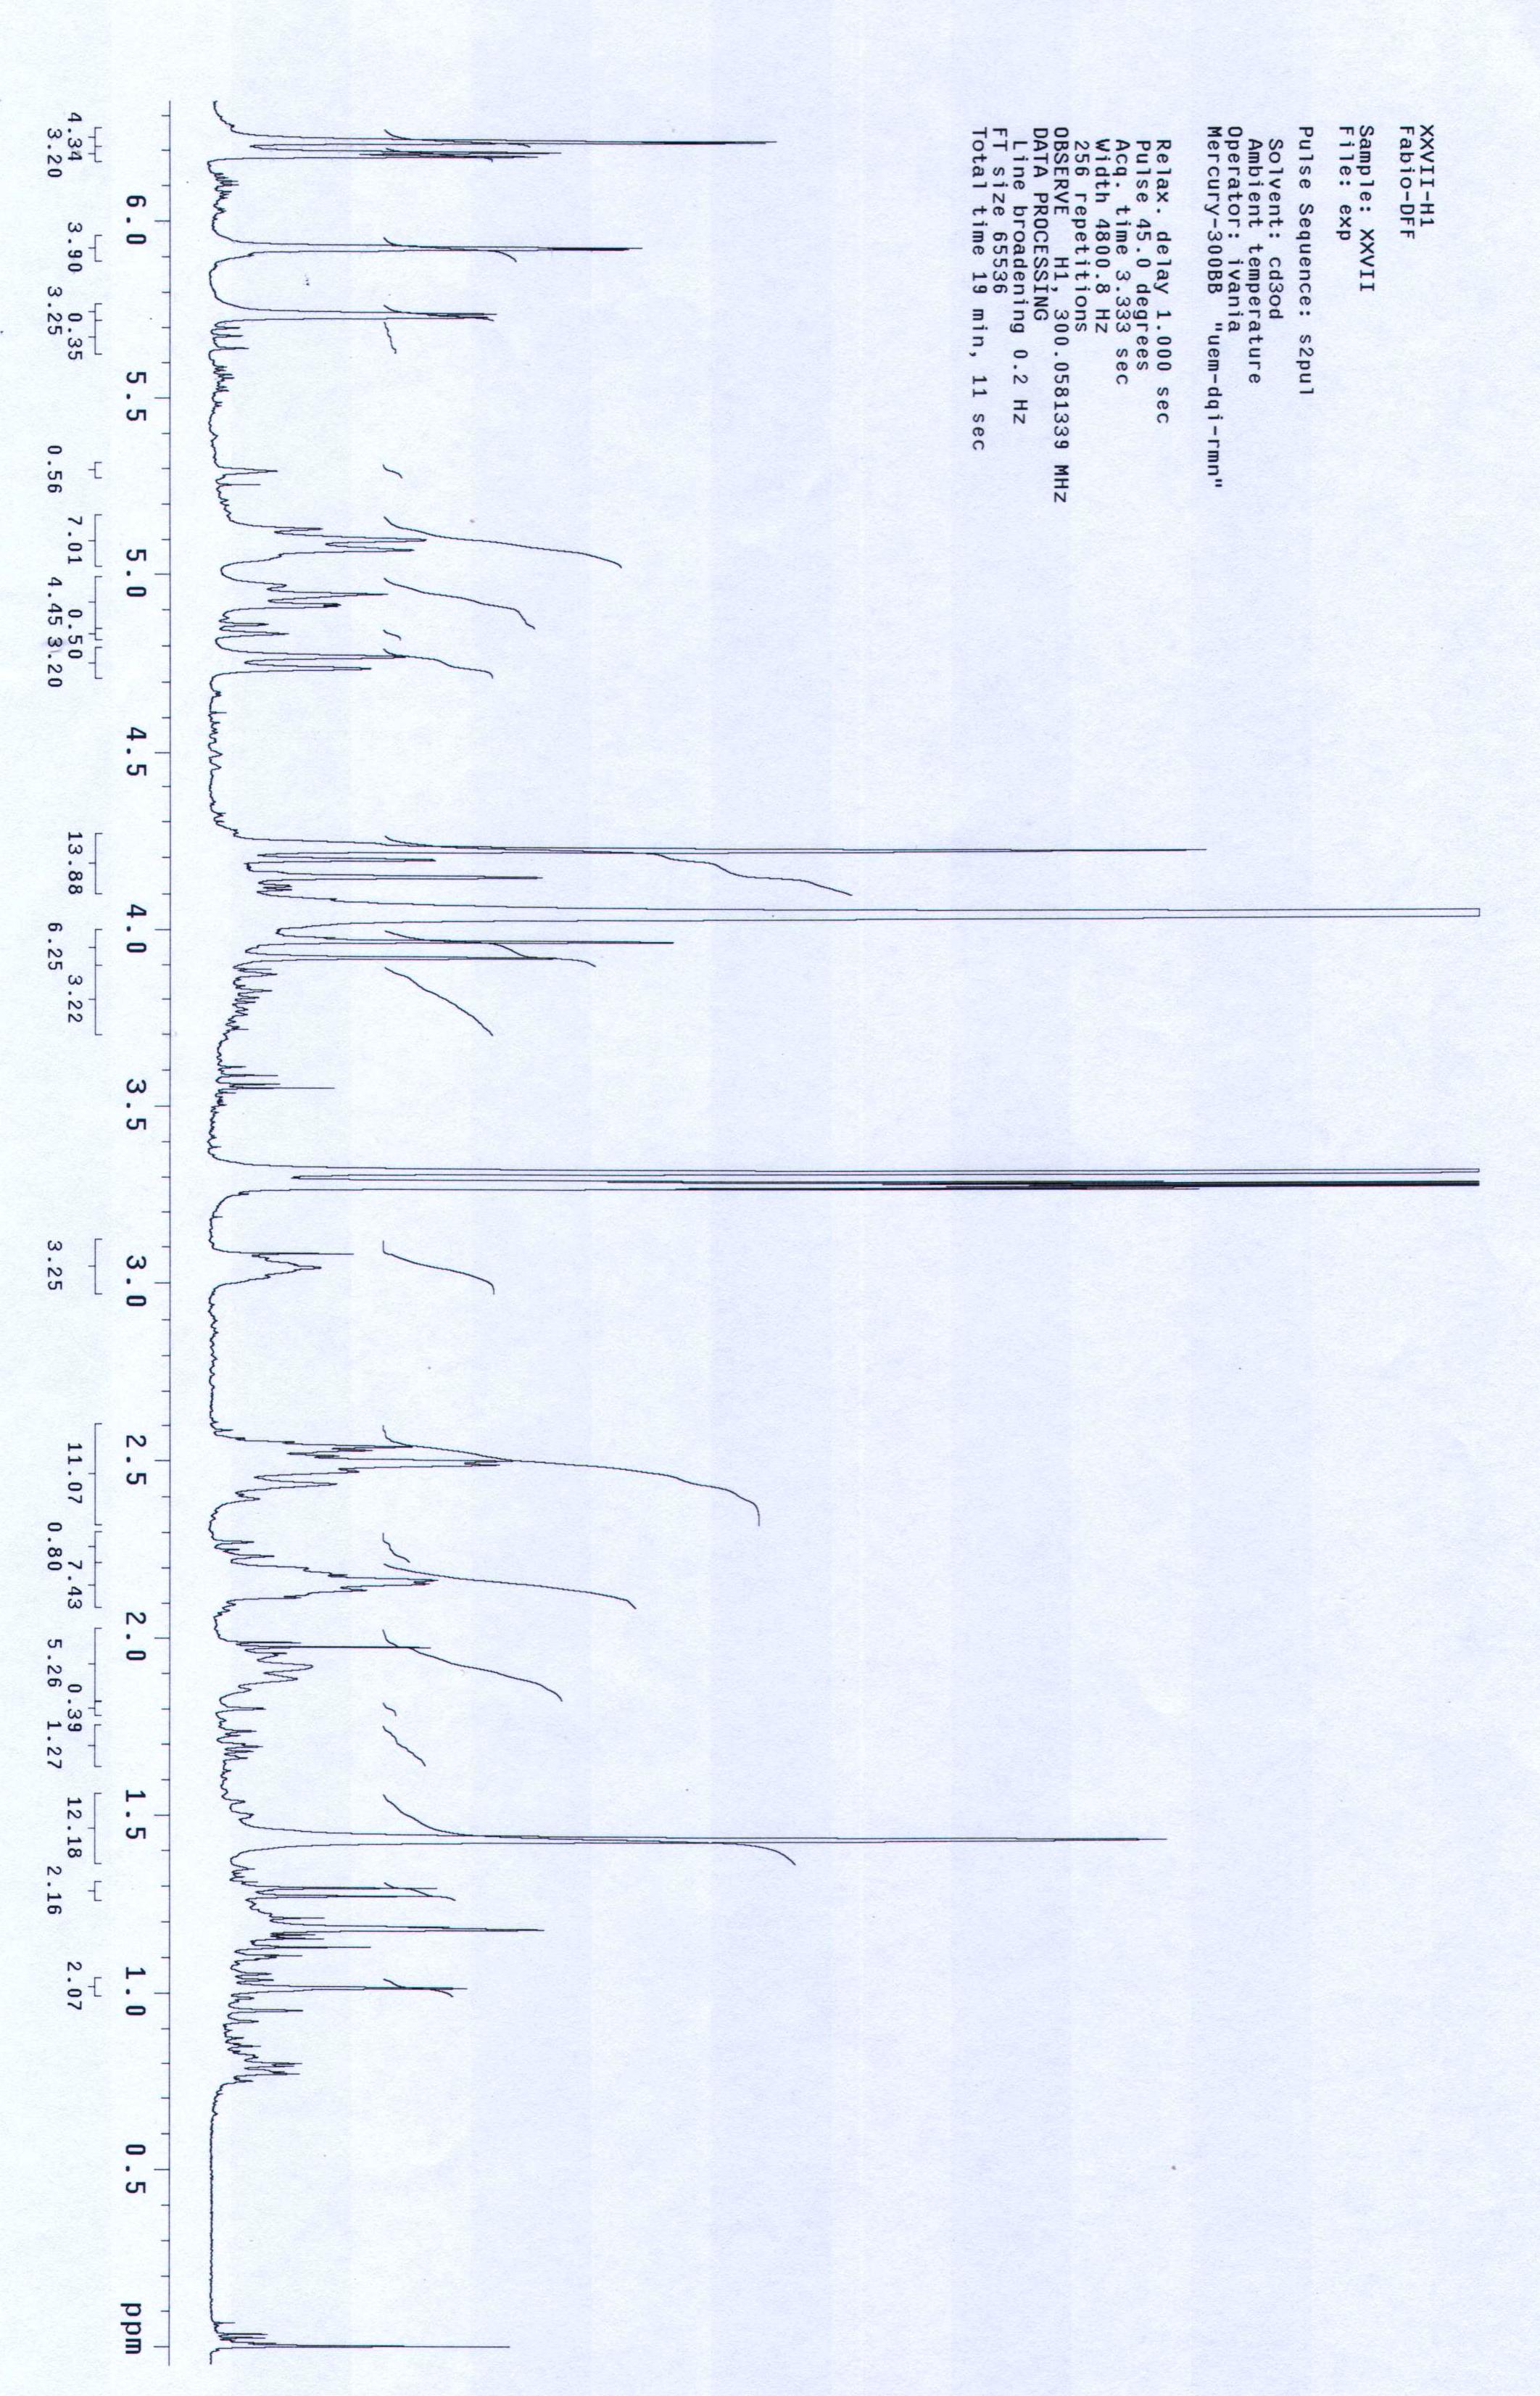
**

**Melitensin (4)**

**Table 4S.** Data of NMR (CDCl3/CD3OD, 300 MHz for 1H and 75 MHz for 13C) of melitensin (**4**) [13].

| **C** | **1H (nH; m, *J* = Hz)** | **gCOSY**  **1H×1H** | **Melitensin [13]*** |
| --- | --- | --- | --- |
| 1 | 5.69 (1H; dd; 17.4; 10.8) | H2a; H2b | 5.75 (dd; 17; 11) |
| 2 | a 4.93(1H; m)  b 4.89 (1H; d; 17.4) | H1  H1 | 5.05 (d; 11)  5.01 (d; 17) |
| 3 | a 5.29 (1H; sl)  b 4.83 (1H; sl) | H3b  H3a | 5.38 (s)  4.95 (s) |
| 5 | 2.25 (1H; d; 11.7) | H6 | 2.40 (d; 11) |
| 6 | 4.15 (1H; m) | H5; H7 | 4.15 (t; 11) |
| 7 | 1.70 (1H; m)) | H11; H6; H8 | 1.85 (m) |
| 8 | 3.78 (1H; ddd; 10.5; 10.2; 4.2) | H9b; H7; H9a | 3.95 (brddd; 10.5; 5.3) |
| 9 | a 1.50 (1H; dd; 13.2; 10.8)  b 1.71 (1H; dd; 13.2; 4.2) | H9b; H8  H9a; H8 | 1.62 (d; 12)  1.80 (m) |
| 11 | 2.59-2.50 (1H; m) | H7; H13 | 2.62 (dq; 12; 7) |
| 13 | 1.29 (3H; d; 6.9) | H11 | 1.41 (d; 7) |
| 14 | 1.02 (3H; s) | - | 1.11 (s) |
| 15 | 4.03 (1H, m)  3.85 (1H; d; 13.8) |  | 4.08 (d; 14  3.98 (d; 14) |

**Figure 5S.** 1H-NMR spectrum of compound **5** (CDCl3/CD3OD, 300 MHz).

**
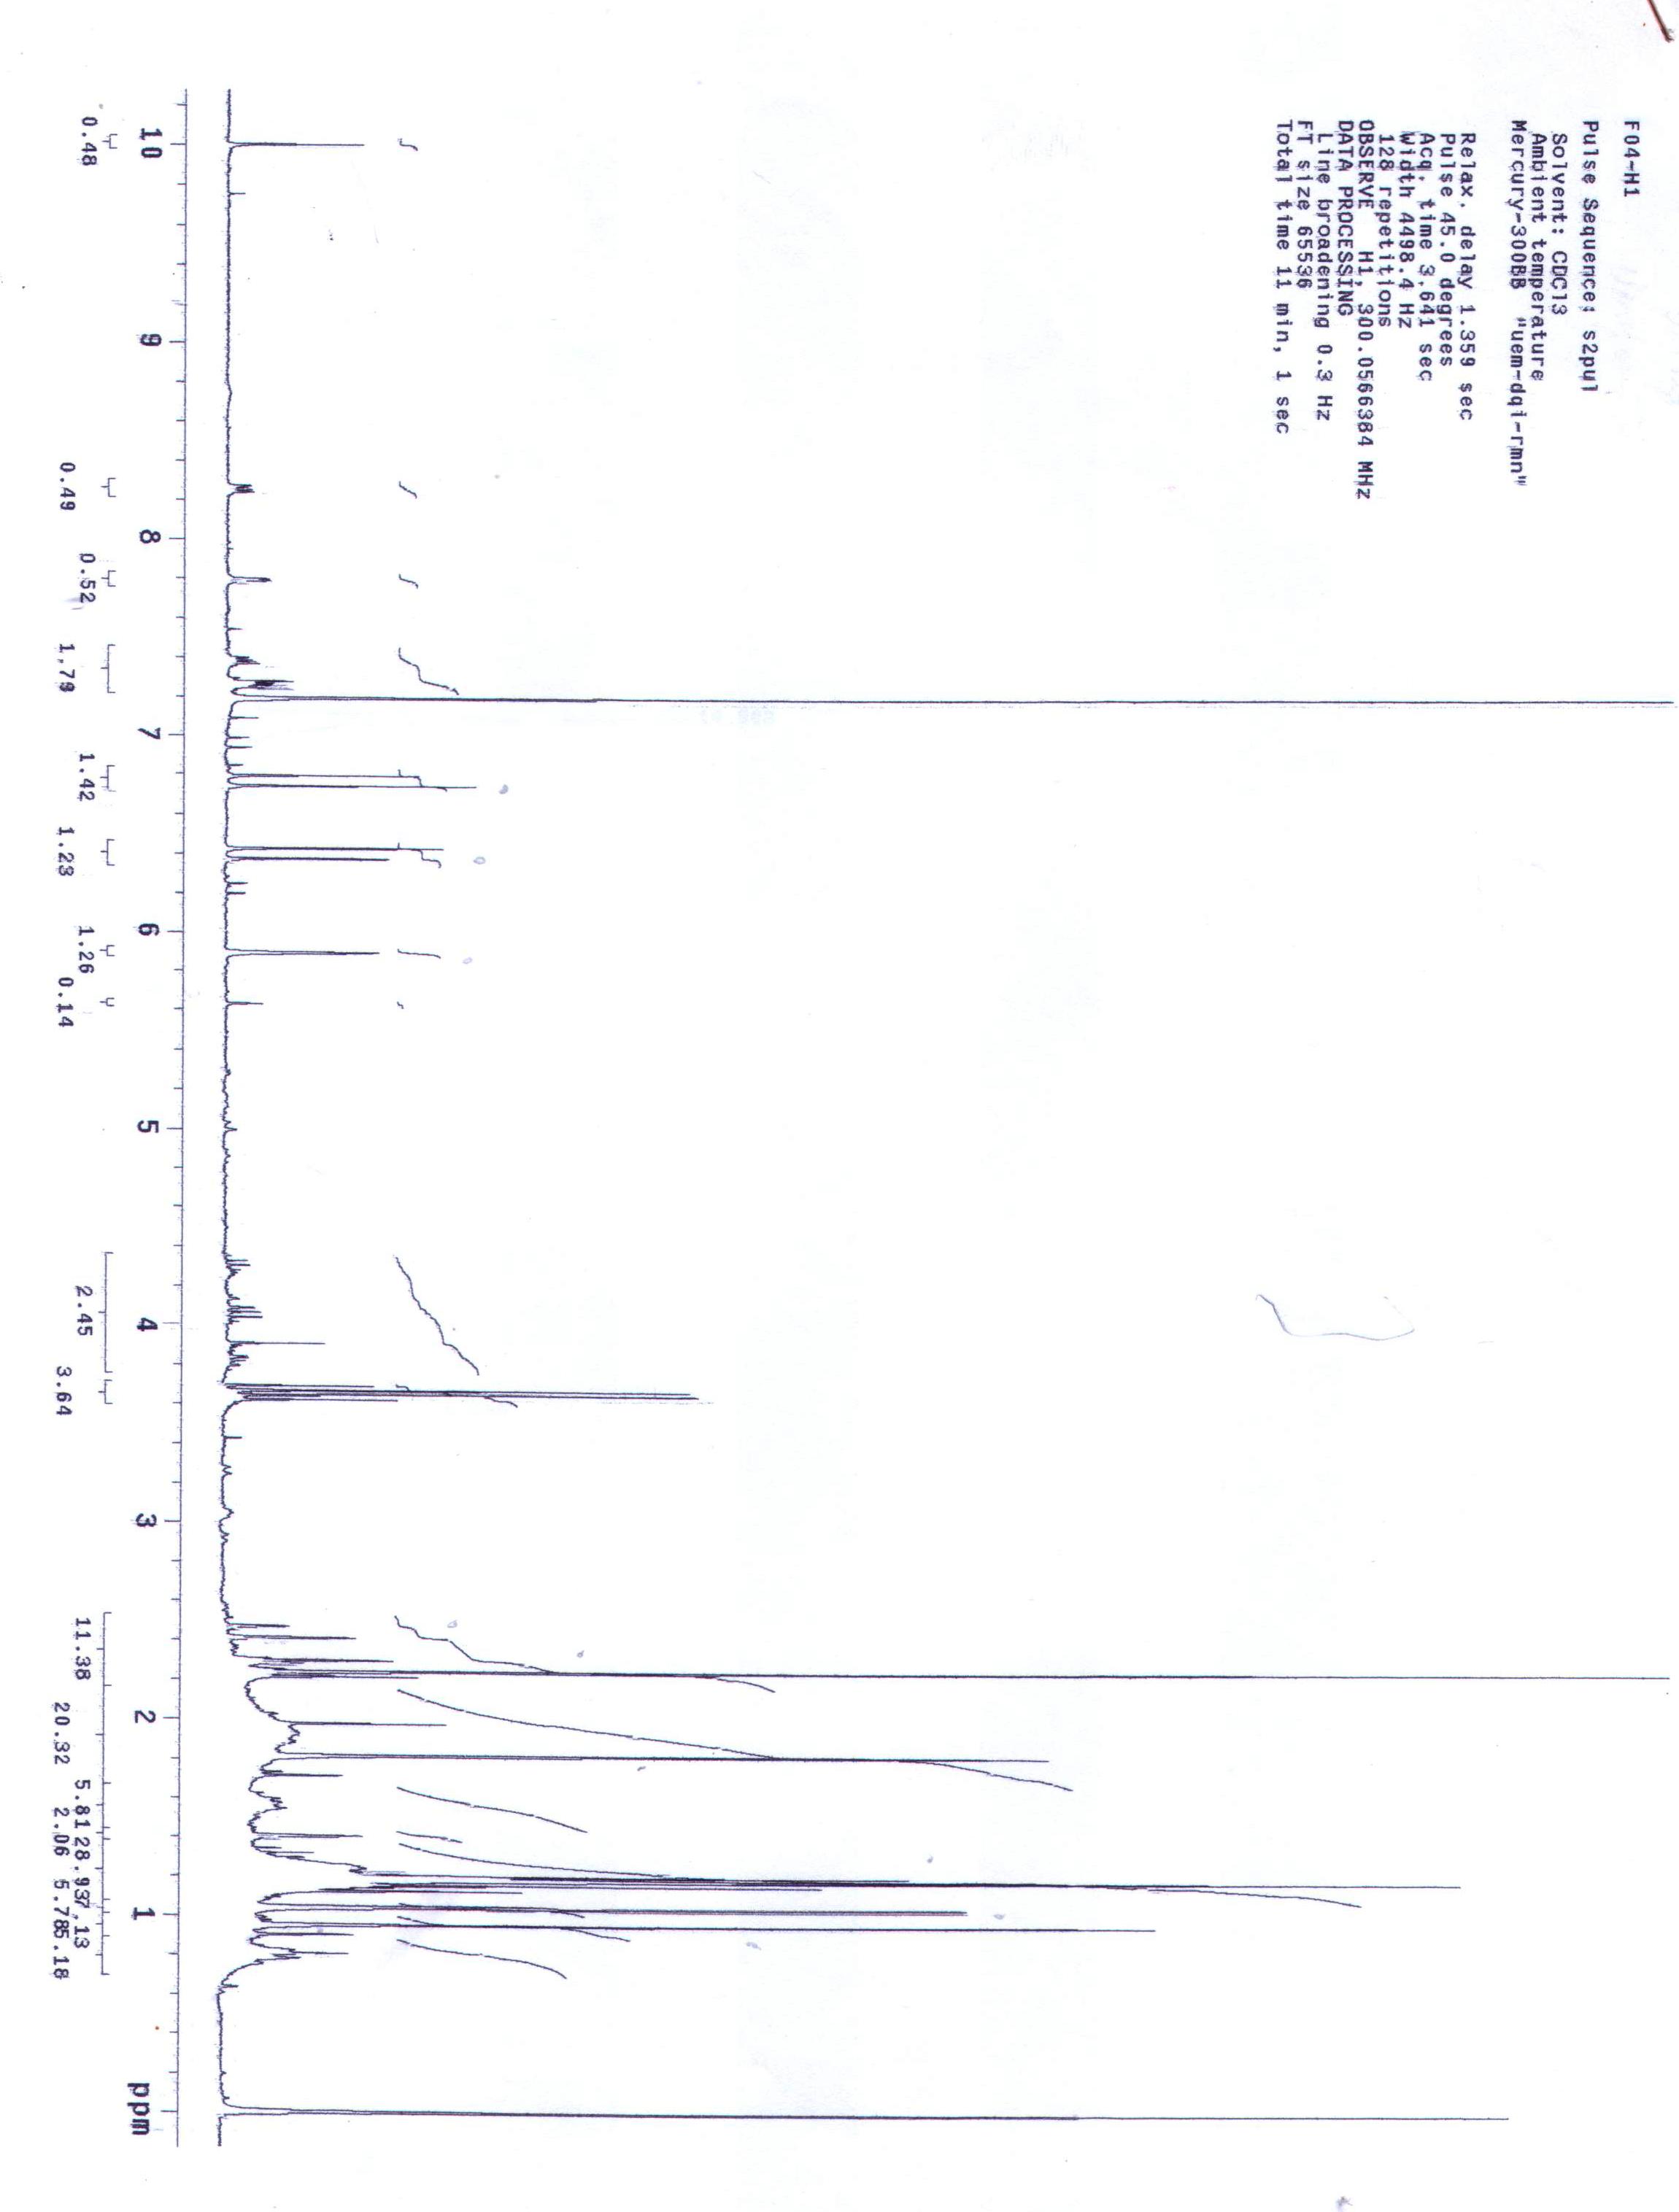
**

**Dehydrovomifoliol (5)**

**Table 5S.** Data of NMR (CDCl3/CD3OD, 300 MHz for 1H and 75 MHz for 13C) of dehydrovomifoliol (**5**) [14].

| **C** | **13C/DEPT** | **gHSQC**  **1H (nH; m, *J* = Hz)** | **gCOSY**  **1H×1H** | **gHMBC**  **1H13C** |
| --- | --- | --- | --- | --- |
| 1 | 41.6/C | - | - | - |
| 2 | 49.8/CH2 | 2.44 (1H; d; 17.1)  2.27 (1H; dd; 17.1; 1.2) | H2b  H2a | C3; C6; C11  C3 |
| 3 | 197.1/C | - | - | - |
| 4 | 128.1/CH | 5.89 (1H; quint; 1.2) | H13 |  |
| 5 | 160.4/C | - | - | - |
| 6 | *79.6/C | - | - | - |
| 7 | 145.1/CH | 6.77 (1H; d; 15.9) | H8 | C6; C9 |
| 8 | 130.6/CH | 6.40 (1H; d; 15.9) | H7 |  |
| 9 | 197.5/C | - | - | _ |
| 10 | 28.6/CH3 | 2.24 (3H; s) | - |  |
| 11 | 23.2/CH3 | 1.04 (3H; s) | - | C1; C2; C6; C12 |
| 12 | 24.6/ CH3 | 0.96 (3H; s) | - | C1; C2; C6; C11 |
| 13 | 18.9/CH3 | 1.82 (3H; d; 1.2) | H4 | C4; C5; C6 |

* signal observed only in the spectrum gHMBC; NOESY: 6.77 (H7) × 2.44 (H2a) and 6.77 (H7) × 1.04 (H11).

**Figure 6S.** 1H-NMR spectrum of compound **6** (CDCl3/CD3OD, 300 MHz).

**
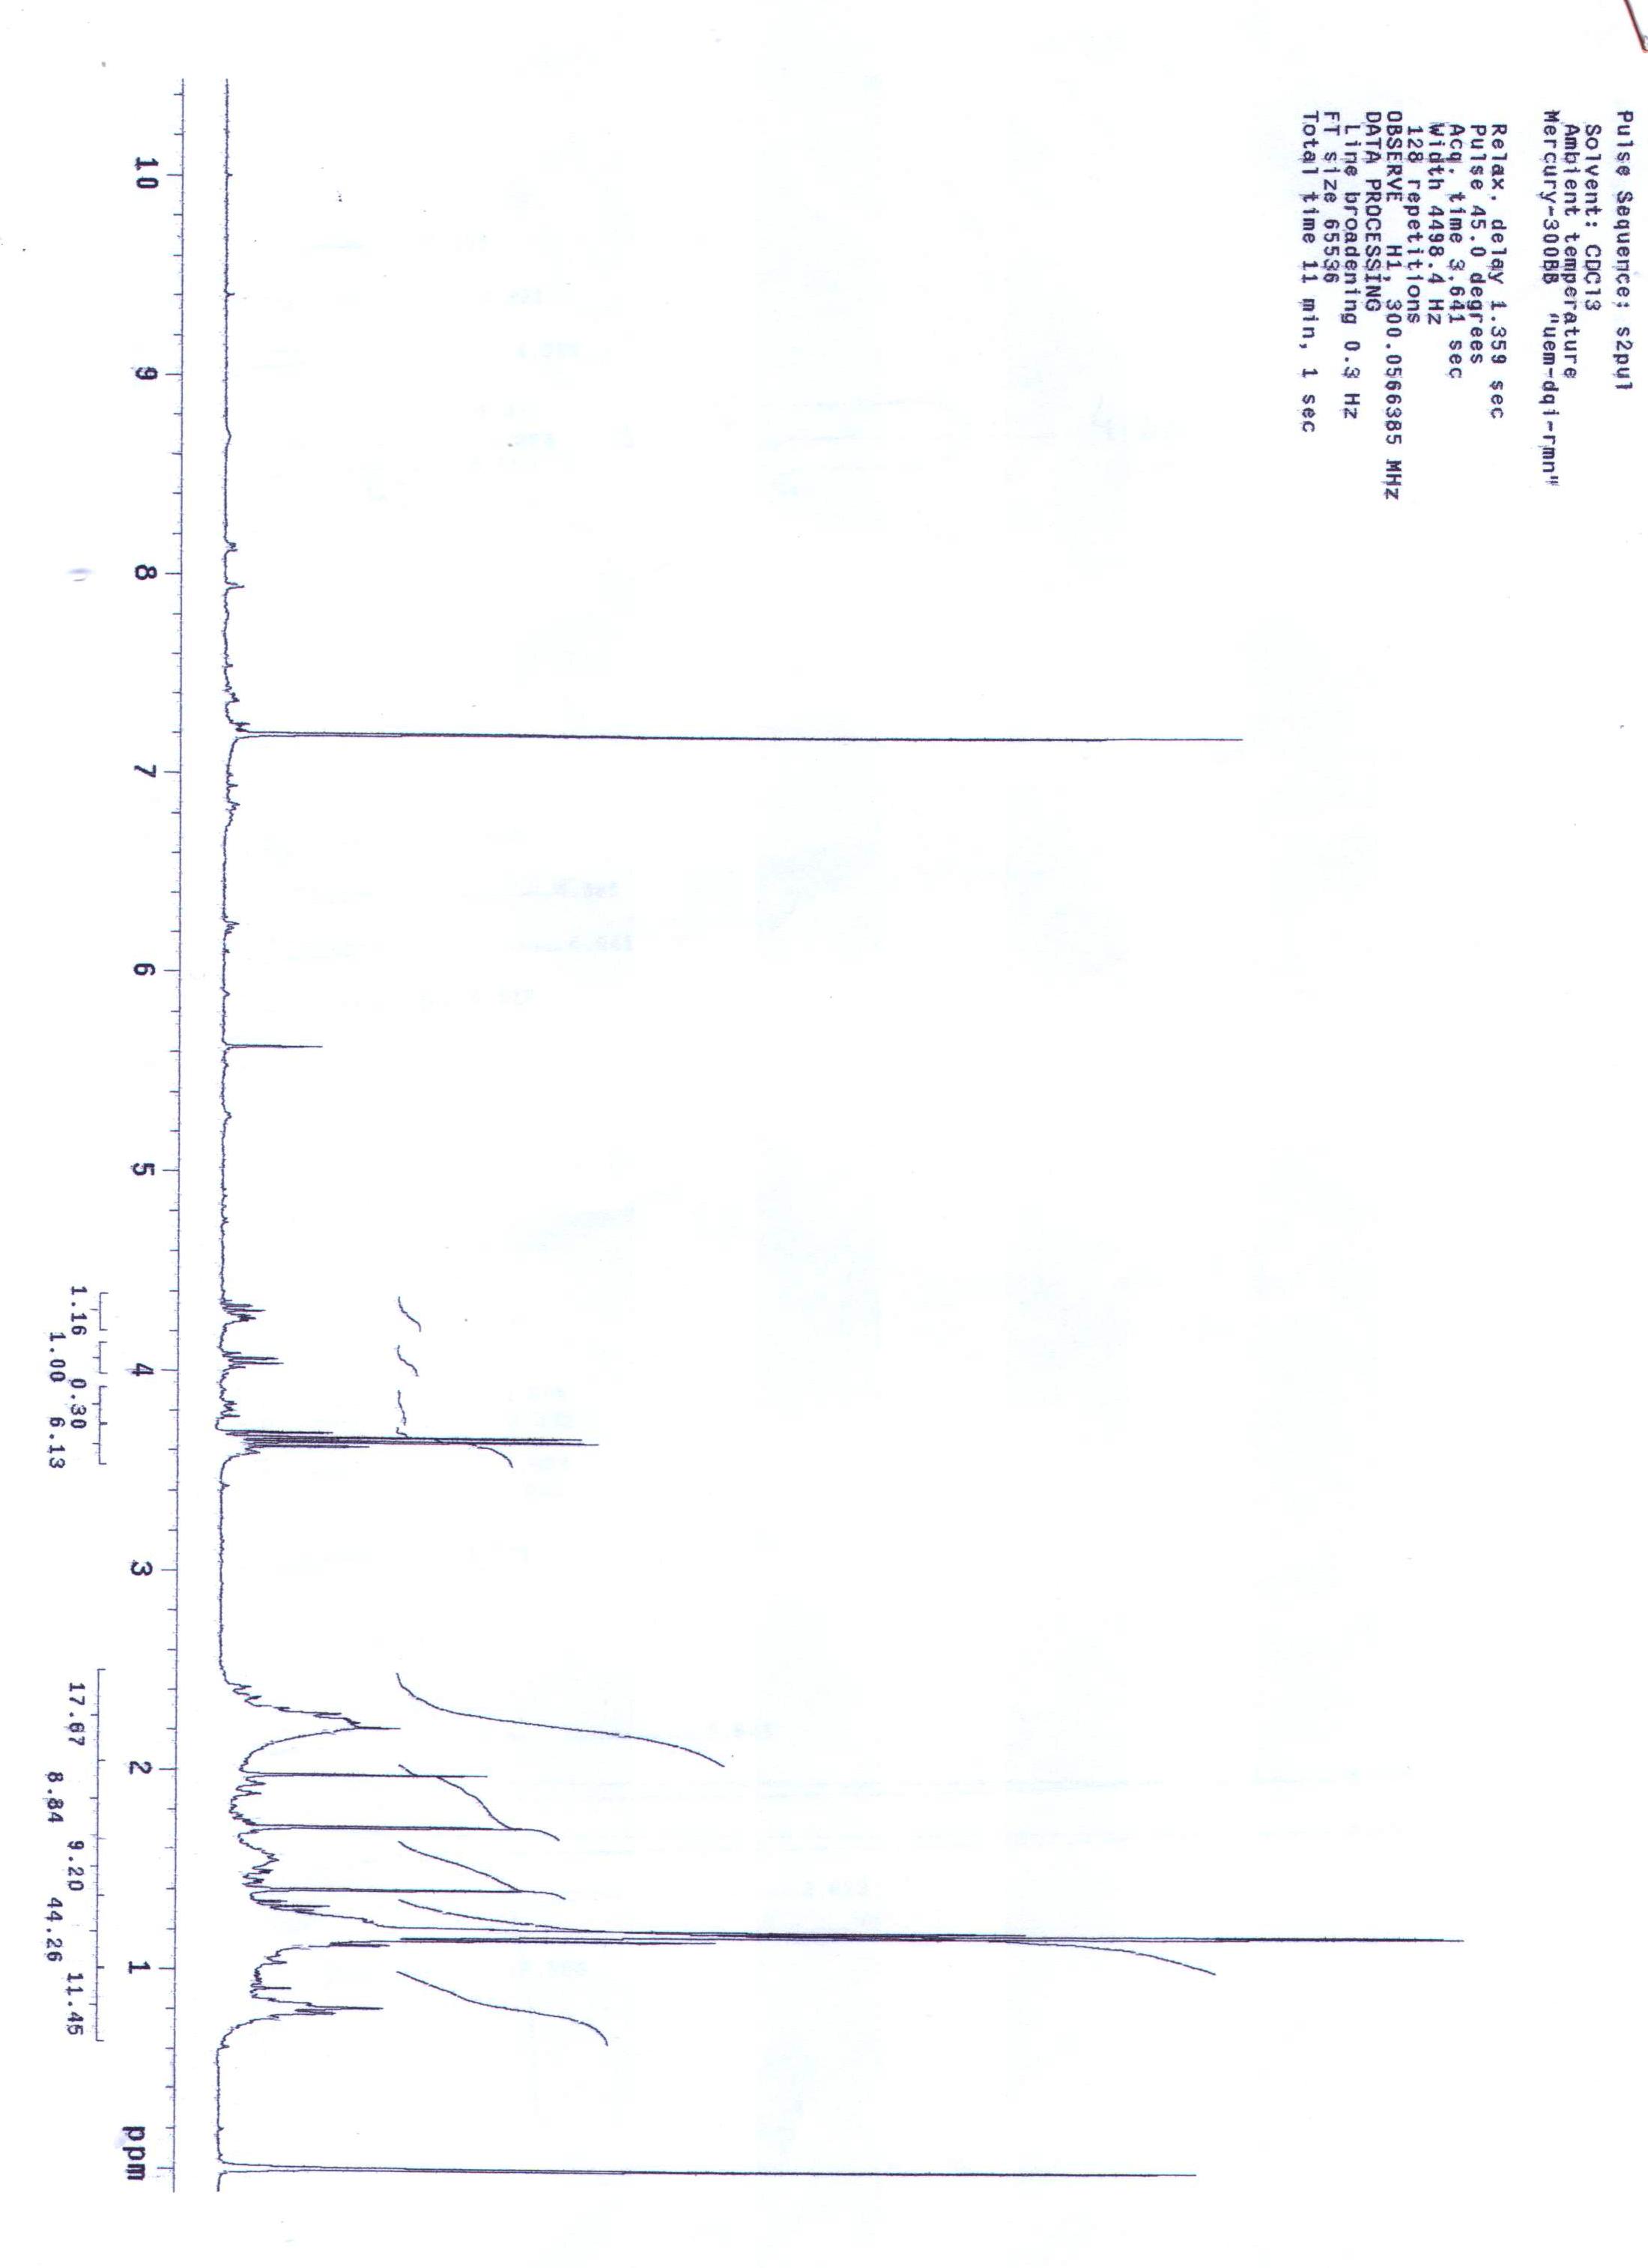
**

**Loliolide (6)**

**Table 6S.** Data of NMR (CDCl3/CD3OD, 300 MHz for 1H and 75 MHz for 13C) of loliolide (**6**) [15].

| **C** | **13C/DEPT** | **1H (nH; m, *J* = Hz)** | **gCOSY**  **1H×1H** | **gHMBC**  **1H13C** |
| --- | --- | --- | --- | --- |
| 1 | *36.1/C | - | - | - |
| 2 | 47.6/CH2 | 1.47 (1H; dd; 14.4; 3.6)  1.91 (1H; dd; 14.4; 2.7) | H2b; H3  H2a |  |
| 3 | 67.1/CH | 4.27 (1H; quint; 3.6) | H2a | - |
| 4 | 45.9 /CH2 | 1.72 (1H; m)  2.39 (1H; dt; 14.1; 2.7) | H4b  H4a |  |
| 5 | *87.0/C | - | - | - |
| 6 | *182.6/C | - | - | - |
| 7 | 113.2/CH | 5.63 (1H; s) | - | C8 |
| 8 | 174.1/C | - | - | - |
| 9 | 30.9/ CH3 | 1.21 (3H; s) | - | C6; C10; C1; C2 |
| 10 | 26.7/CH3 | 1.40 (3H; s) | - | C2; C9; C1; C6 |
| 11 | 27.2/CH3 | 1.71 (3H; s) | - | C5; C4; C6 |

* Signals observed only in the spectrum gHMBC
